# Supplementary figures and images for: Combined Mass Spectrometry Imaging and Top-down Microproteomics Reveals Evidence of a Hidden Proteome in Ovarian Cancer
Source: PubMed Central journal article supplement — eBioMedicine. 2017 Jun 3;21:55–64. doi: 10.1016/j.ebiom.2017.06.001 (PMC5514399; doi:10.1016/j.ebiom.2017.06.001), 2017-06-03

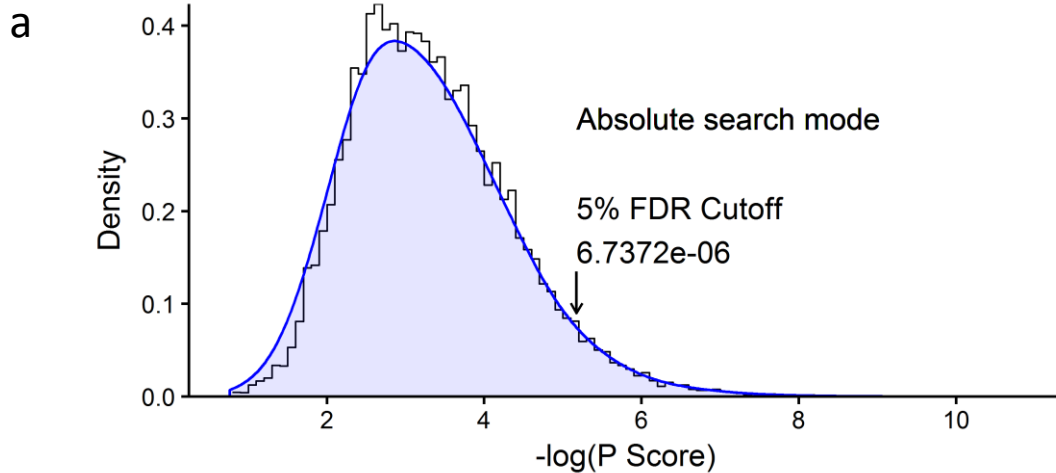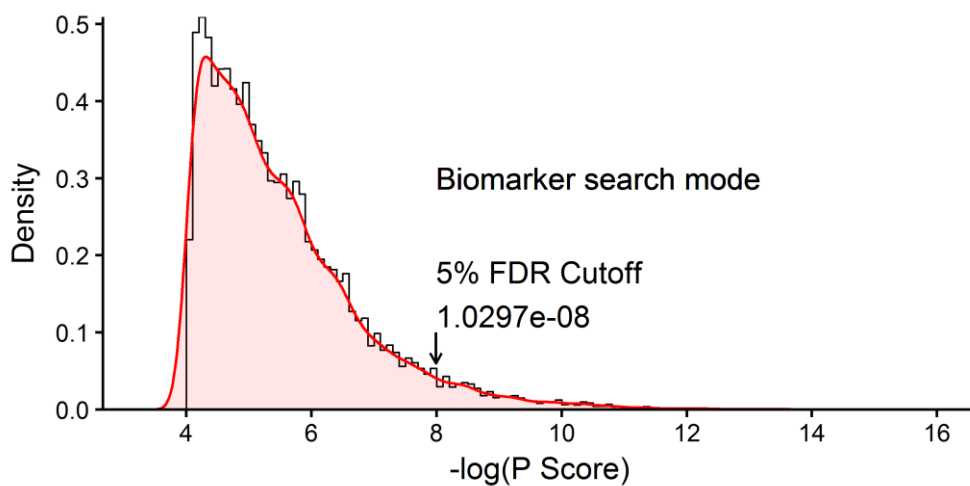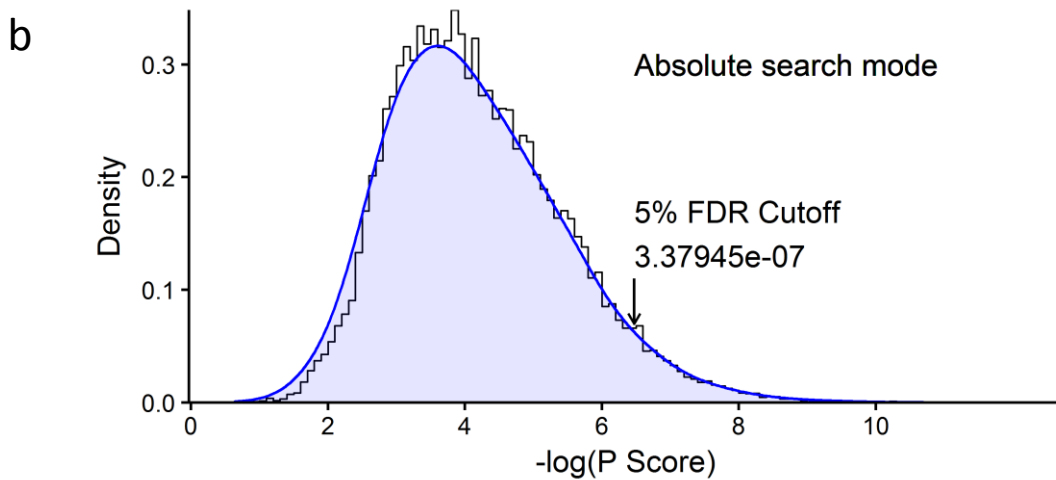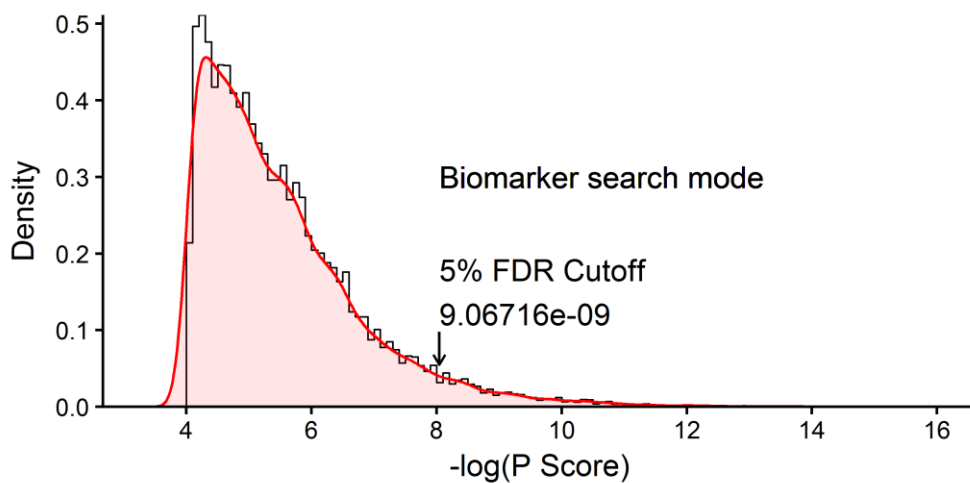

Supplement: mmc1.pdf [file mmc1.pdf]
